# Supplementary material
Source: PubMed Central journal article supplement (PMC3133611)
Supplement: NIHMS301715-supplement-Methods_and_Figs.pdf [file NIHMS301715-supplement-Methods_and_Figs.pdf]

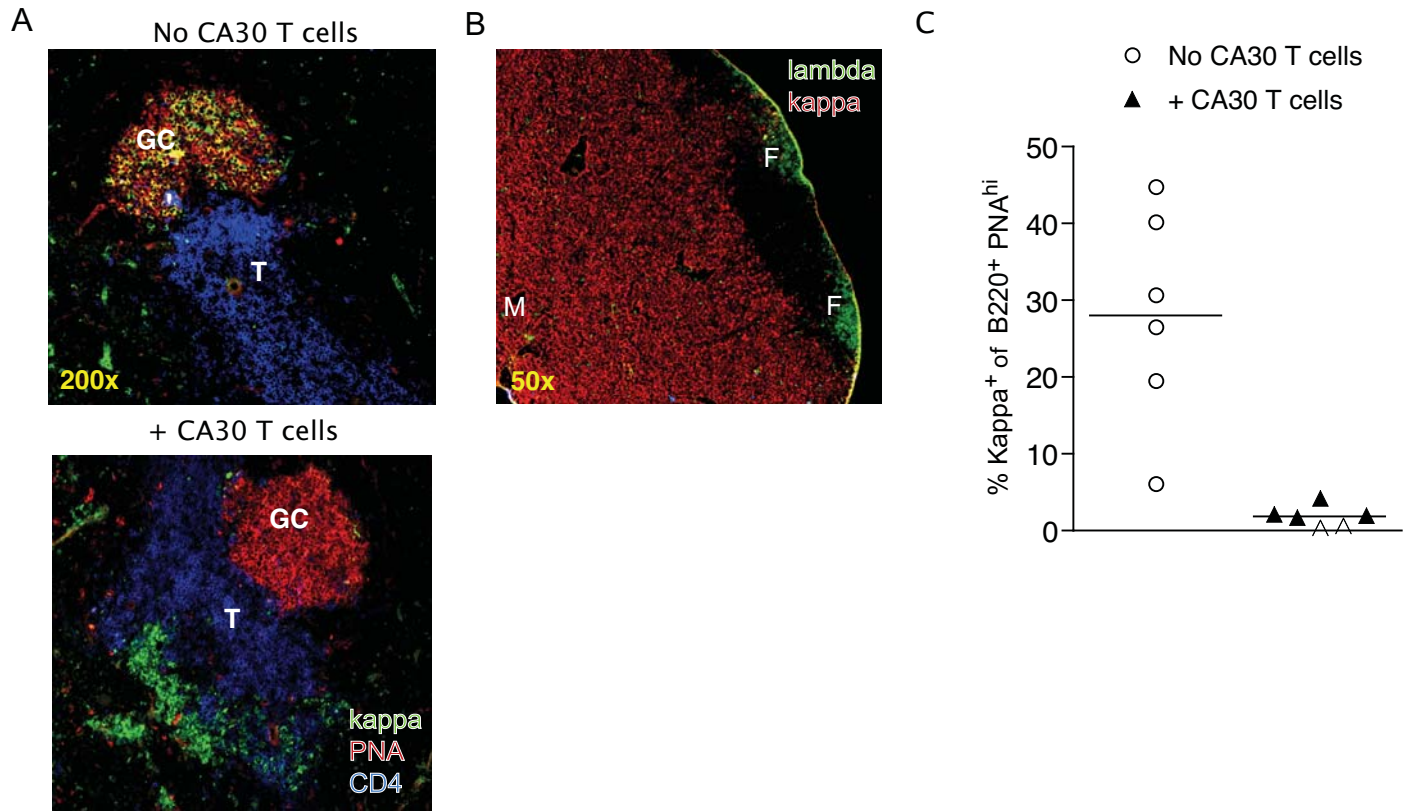

Supplemental Figure 1. (A) Representative images of day 14 splenic follicles from mice that received (right) or did not receive (left)  $2.5 \times 10^5$  CA30 T cells along with  $5 \times 10^4$   $\kappa$ Tg splenocytes together on day 0, followed by immunization with G $\alpha$ M $\kappa$  in alum. (B) Representative day 14 image showing  $\lambda^+$  and  $\kappa^+$  B cells within a lymph node taken from an adoptive transfer recipient that received  $5.0 \times 10^4$   $\kappa$ Tg splenocytes on day 0, was immunized with G $\alpha$ M $\kappa$ , and received  $2.5 \times 10^5$  CA30 T lymph node cells on day 7. F denotes follicle; M denotes medulla. Data in both (A) and (B) are representative of at least 3 independent experiments with 3-5 mice per group. (C) Recapitulation of the standard protocol with  $5.0 \times 10^4$   $\kappa$ Tg splenocytes transferred on day 0, followed by immunization with kappa light-chain specific antigen Protein L (50  $\mu$ g). The figure shows the percent of GC cells (B220<sup>+</sup> PNA<sup>hi</sup>) that are kappa<sup>+</sup> on day 14 in mice that received (triangle) or did not receive (o) CA30 T cells on day 7. These data are representative of two independent experiments.

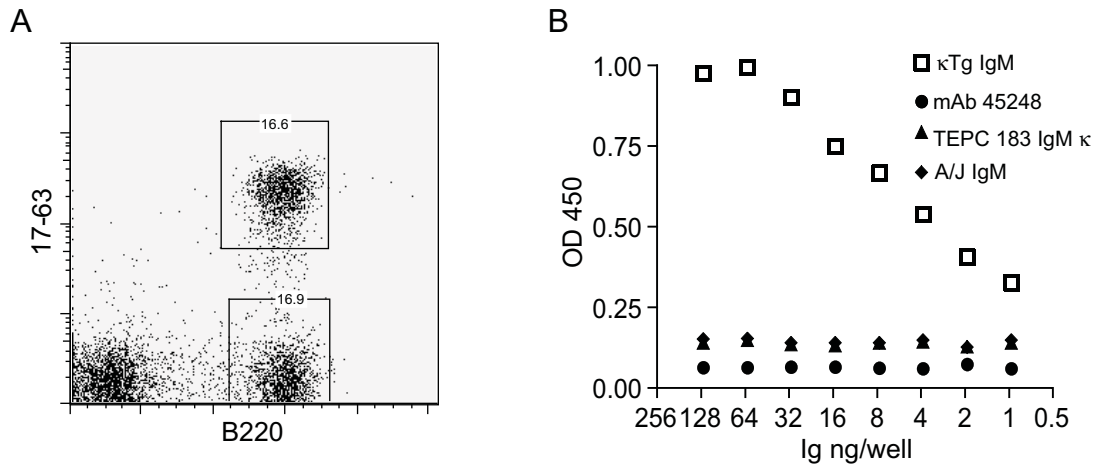

Supplemental Figure 2. (A) Monoclonal antibody 17-63 (mAb17-63) discriminates κTg B cells from wild-type A/J B cells by FACS. A 1:1 mixture of κTg κ<sup>-/-</sup> and wild-type A/J splenocytes were labeled with anti-B220 and mAb17-63. (B) mAb17-63 specifically recognizes Ig containing the κTg light chain by ELISA. Various κ<sup>+</sup> IgM samples were tested for their ability to bind mAb17-63-coated wells. Binding was detected with an anti-ν heavy chain-specific antibody. "κTg IgM" is a mAb that uses the same κ chain expressed by κTg B cells. "mAb45-248" is encoded by an unmutated version of the same Vκ gene used by κTg B cells. "TEPC183" is a murine IgM kappa (Sigma, St. Louis, MO). A/J IgM was affinity purified from A/J sera (~95% kappa).

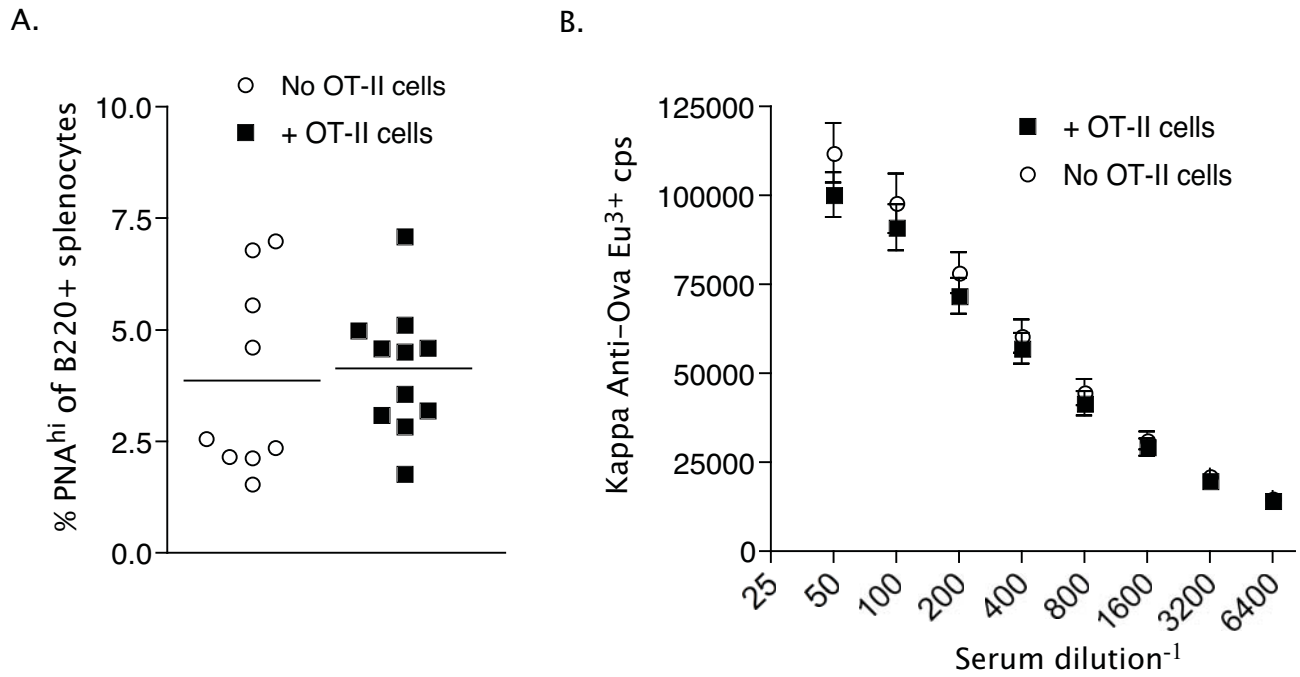

Supplemental Figure 3. (A) Quantification of the percent of splenic GC cells (B220+ PNA<sup>hi</sup>) among total B220+ cells at day 13 following immunization with 100  $\mu$ g of OVA in alum (day 0) with (square) or without (o) transfer of  $2.5 \times 10^5$  enriched OT-II transgenic CD4 T cells on day 7. ( $p=0.37$  one-tailed t-test) (B) Serum  $\kappa^+$  antibody titers (to include both IgG and IgM) against OVA at day 13. Symbols represent mean values for each group ( $n = 9$ , No OT-II cells;  $n = 11$ , + OT-II cells) with SEM shown. Data are a composite of two independent experiments.

A

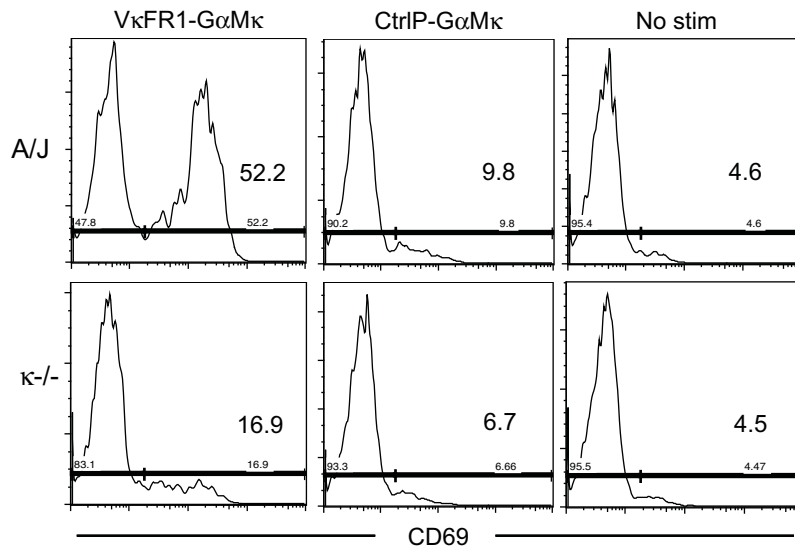

Supplemental Figure 4. (A) VκFR1-GαMκ and CtrlP-GαMκ were tested in vitro for their ability to activate naïve CA30 T cells upon BCR mediated uptake by wild-type A/J B cells.  $1.0 \times 10^5$  enriched A/J or κ-/- B cells were incubated O/N with  $5 \times 10^4$  enriched naïve CA30 T cells with 5 μg/ml of VκFR1-GαMκ, CtrlP-GαMκ, or media alone. After 14 hours of incubation, the percent of CD4+ Vβ8.1/8.2+ T cells expressing CD69 was determined by flow cytometry. Data are representative of two independent experiments.
